# Supplementary material for: A COLQ Missense Mutation in Sphynx and Devon Rex Cats with Congenital Myasthenic Syndrome
Source: PLoS One. 2015 Sep 1;10(9):e0137019. doi: 10.1371/journal.pone.0137019 (PMC4556666; doi:10.1371/journal.pone.0137019)
Supplement: S2 Table — SNP genotypes for each cat were manually inspected with Excel to identify homozygous regions shared by the two affected cats. Only one region from chromosome C2 was consistent with the highly-probable heterozygous status of the sire and dam, the non-homozygously mutated status of the proband’s healthy littermate and the inferred heterozygous status of the paternal grandmother. Homozygosity for the allele shared by the affected sib-pair is shown in light green. Heterozygosity or homozygosity for the opposite allele is shown in white (chromosomes A3, B3, C1, D1 and E1) or in yellow (chromosome C2). Missing genotypes are noticed 0. Chr: chromosome. bp: base pairs. (XLSX) [file pone.0137019.s005.xlsx]

## Sheet: Chr A3
		Status	Healthy carrier	Healthy carrier	Affected	Affected	Non carrier	Putative healthy carrier	Non affected
Chr	SNP	Position (bp)	Dam	Sire	Proband	Brother	Grandfather	Grandmother	Proband's littermate
A3	chrA3.89712807	69696986	AA	GA	AA	AA	GG	GA	AA
A3	chrA3.90004102	69945330	AA	AA	AA	AA	AA	AA	AA
A3	chrA3.90122445	70043366	GG	GG	GG	GG	GG	GG	GG
A3	chrA3.90250027	70135347	GG	AG	GG	GG	AG	GG	GG
A3	chrA3.90687627	70484162	GG	AG	GG	GG	AA	GG	GG
A3	chrA3.90758570	70532801	GG	AG	GG	GG	AA	GG	GG
A3	chrA3.90782829	70552326	GG	GG	GG	GG	GG	GG	GG
A3	chrA3.90879671	70633613	CC	CC	CC	CC	CC	CC	CC
A3	chrA3.91083836	70794260	AA	AA	AA	AA	GA	AA	AA
A3	chrA3.91227598	70913823	GG	GG	GG	GG	GG	GG	GG
A3	chrUn.71350182	70948391	AA	AA	AA	AA	AA	AA	AA
A3	chrA3.91291233	70968540	AA	GA	AA	AA	GG	GA	AA
A3	chrA3.91441950	71097889	GG	GG	GG	GG	GG	GG	GG
A3	chrA3.91556894	71206493	CC	AC	CC	CC	AC	AC	CC
A3	chrA3.91712570	71335687	GG	AG	GG	GG	AA	AG	GG
A3	chrA3.91770408	71383997	GG	GG	GG	GG	AG	GG	GG
A3	chrA3.91876174	71477056	GG	AG	GG	GG	AA	AG	GG
A3	chrA3.91924937	71519516	AA	AA	AA	AA	AA	AA	AA
A3	chrA3.91951794	71539649	AA	AA	AA	AA	AA	AA	AA
A3	chrUn.32373771	71543205	GG	GG	GG	GG	GG	GG	GG
A3	chrA3.92218168	71753290	AA	AA	AA	AA	AA	AA	AA
A3	chrA3.92284262	71804493	CC	CC	CC	CC	AC	AC	CC
A3	chrA3.92324367	71841023	GG	AG	GG	GG	AA	AG	GG
A3	chrA3.92663795	72125032	GG	GG	GG	GG	GG	GG	GG
A3	chrA3.92693674	72149357	AA	AA	AA	AA	AA	AA	AA
A3	chrA3.92737808	72180073	AA	GA	AA	AA	GA	AA	AA
A3	chrA3.92808661	72238951	AA	GA	AA	AA	GA	AA	AA
A3	chrA3.92919534	72336810	AA	GA	AA	AA	GA	AA	AA
A3	chrA3.93139682	72522698	GG	GG	GG	GG	GG	GG	GG
A3	chrUn.5203293	72684001	0	CA	CA	0	AA	CA	CA
A3	chrA3.93364634	72690750	GG	AG	GG	GG	AG	GG	GG
A3	chrA3.93327769	72744654	GG	AG	GG	GG	AA	AG	GG
A3	chrA3.93447584	72819355	GG	GG	GG	GG	AG	AG	GG
A3	chrA3.93503171	72875484	AA	AA	AA	AA	AA	AA	0
A3	chrA3.93608575	72975440	CC	CC	CC	CC	CC	CC	CC
A3	chrUn.45247665	73199065	CC	CC	CC	CC	CC	CC	CC
A3	chrUn.51685593	73340512	GG	GG	GG	GG	GG	GG	0
A3	chrA3.94030100	73347510	AA	AA	AA	AA	AA	AA	AA
A3	chrB1.189480060	73392962	GG	AG	GG	GG	AA	AG	GG
A3	chrA3.94117447	73406774	AA	AA	AA	AA	AA	AA	AA
A3	chrUn.32024421	73427722	GG	AG	GG	GG	AA	AG	GG
A3	chrA3.94168092	73448534	AA	AA	AA	AA	AA	AA	AA
A3	chrA3.94388023	73615096	GG	GG	GG	GG	GG	GG	GG
A3	chrUn.75031820	73654192	CC	CC	CC	CC	CC	CC	CC
A3	chrA3.94635270	73823113	AA	AA	AA	AA	AA	AA	AA
A3	chrA3.94793183	73941299	AA	CA	AA	AA	CA	AA	AA
A3	chrA3.94973423	74101463	AA	AA	AA	AA	AA	AA	AA
A3	chrA3.95009855	74135703	AA	AA	AA	AA	AA	AA	AA
A3	chrUn38.12100630	74254635	AA	GA	AA	AA	GG	GA	AA
A3	chrUn38.12147969	74313291	CC	CC	CC	CC	CC	CC	CC
A3	chrUn38.12177043	74343462	GG	GG	GG	GG	GG	GG	GG
A3	chrUn38.12200965	74354141	AA	GA	AA	AA	GG	GA	AA
A3	chrB4.138673965	74427944	AA	GA	AA	AA	GG	GA	AA
A3	chrA3.95361131	74502367	AA	GA	AA	AA	GG	GA	AA
A3	chrA3.95401612	74542677	GG	AG	GG	GG	AA	AG	GG
A3	chrA3.95426576	74558684	AA	AA	AA	AA	AA	AA	AA
A3	chrA3.95585501	74701455	AA	AA	AA	AA	AA	AA	AA
A3	chrA3.95667120	74767732	GG	GG	GG	GG	GG	GG	GG
A3	chrA3.95966460	75014980	GG	AG	GG	GG	AA	AG	GG
A3	chrUn.63739626	75123732	CC	CC	CC	CC	CC	CC	CC
A3	chrA3.96104894	75133737	AA	AA	AA	AA	AA	AA	0
A3	chrA3.96294994	75305744	GG	GG	GG	GG	GG	GG	GG
A3	chrA3.96340151	75340922	GG	GG	GG	GG	GG	GG	GG
A3	chrA3.96387815	75382482	AA	AA	AA	AA	AA	AA	AA
A3	chrA3.96464082	75445095	GG	GG	GG	GG	GG	GG	0
A3	chrA3.96523835	75487905	GG	GG	GG	GG	AG	AG	GG
A3	chrA3.96595018	75548285	GG	AG	GG	GG	AA	AG	GG
A3	chrA3.96643009	75593805	AA	GA	AA	AA	GG	GA	AA
A3	chrA3.96717829	75643072	GG	GG	GG	GG	GG	GG	GG
A3	chrA3.96768507	75678724	GG	GG	GG	GG	AG	AG	GG
A3	chrA3.96835647	75723883	GG	GG	GG	GG	GG	GG	GG
A3	chrA3.96901648	75778262	AA	AA	AA	AA	AA	AA	AA
A3	chrA3.96954866	75824831	GG	AG	GG	GG	AA	AG	GG
A3	chrA3.97016169	75877178	CC	AC	CC	CC	AC	CC	CC
A3	chrA3.97019762	75880771	AA	AA	AA	AA	AA	AA	AA
A3	chrA3.97081075	75940450	CC	CC	CC	CC	AC	AC	CC
A3	chrA3.97123326	75971674	AA	AA	AA	AA	GA	GA	AA
A3	chrA3.97155501	75997824	AA	AA	AA	AA	GA	GA	AA
A3	chrA3.97197194	76034393	GG	GG	GG	GG	GG	GG	GG
A3	chrA3.97258067	76082553	AA	AA	AA	AA	AA	AA	AA
A3	chrA3.97293473	76105100	AA	GA	AA	AA	GA	AA	AA
A3	chrA3.97392802	76190085	AA	GA	AA	AA	GA	AA	AA
A3	chrA3.97458417	76248215	GG	GG	GG	GG	AG	AG	GG
A3	chrA3.97533818	76325214	AA	GA	AA	AA	GG	GA	AA
A3	chrA3.97595876	76373837	CC	CC	CC	CC	CC	CC	CC
A3	chrA3.97628167	76400379	GG	AG	GG	GG	AA	AG	GG
A3	chrA3.97652440	76420230	GG	GG	GG	GG	GG	GG	GG
A3	chrA3.97653784	76421495	AA	GA	AA	AA	GG	GA	AA
A3	chrA3.97714068	76464848	AA	AA	AA	AA	AA	AA	AA
A3	chrA3.97787655	76526752	GG	GG	GG	GG	GG	GG	GG
A3	chrA3.97835969	76566467	AA	AA	AA	AA	AA	AA	0
A3	chrA3.97903009	76632821	AA	GA	AA	AA	GA	AA	AA
A3	chrA3.97974002	76696094	GG	GG	GG	GG	GG	GG	GG
A3	chrA3.98022012	76740966	CC	AC	CC	CC	AA	AC	CC
A3	chrA3.98066361	76771705	AA	AA	AA	AA	AA	AA	AA
A3	chrA3.98095822	76800364	GG	GG	GG	GG	GG	GG	GG
A3	chrA3.98157888	76844232	GG	GG	GG	GG	GG	GG	GG
A3	chrA3.98195469	76879165	GG	GG	GG	GG	GG	GG	GG
A3	chrA3.98246223	76920886	GG	GG	GG	GG	GG	GG	GG
A3	chrA3.98279595	76945109	AA	AA	AA	AA	AA	AA	AA
A3	chrUn.61198824	76960026	AA	AA	AA	AA	CA	CA	AA
A3	chrA3.98307709	76964563	GG	AG	GG	GG	AA	AG	GG
A3	chrA3.98336411	76986433	GG	GG	GG	GG	GG	GG	GG
A3	chrA3.98370553	77016677	AA	GA	AA	AA	GA	AA	AA
A3	chrA3.98414319	77056942	GG	GG	GG	GG	GG	GG	GG
A3	chrA3.98421910	77060031	GG	GG	GG	GG	GG	GG	GG
A3	chrA3.98497082	77121404	GG	AG	GG	GG	AA	AG	GG
A3	chrA3.98535073	77158997	GG	GG	GG	GG	GG	GG	GG
A3	chrA3.98562358	77176767	CC	CC	CC	CC	AC	AC	CC
A3	chrA3.98611053	77227617	GG	AG	GG	GG	AA	AG	GG
A3	chrA3.98669407	77278453	CC	CC	CC	CC	CC	CC	CC
A3	chrA3.98743016	77335626	GG	GG	GG	GG	GG	GG	GG
A3	chrA3.98766765	77356593	AA	AA	AA	AA	AA	AA	AA
A3	chrA3.98806109	77383846	AA	GA	AA	AA	GA	AA	AA
A3	chrA3.98943684	77504293	AA	AA	AA	AA	AA	AA	AA
A3	chrA3.98973593	77516705	GG	GG	GG	GG	GG	GG	GG
A3	chrA3.99029408	77566812	AA	GA	AA	AA	GG	GA	AA
	Homozygous region (bp)	7 869 826

## Sheet: Chr B3
		Status	Healthy carrier	Healthy carrier	Affected	Affected	Non carrier	Putative healthy carrier	Non affected
Chr	SNP	Position (bp)	Dam	Sire	Proband	Brother	Grandfather	Grandmother	Proband's littermate
B3	chrB3.2973545	2134556	GA	GA	AA	AA	GA	AA	AA
B3	chrB3.3229454	2257190	AA	GA	AA	AA	GG	GA	AA
B3	chrB3.3396474	2348293	GG	AG	GG	GG	AA	GG	GG
B3	chrB3.3640653	2425389	AG	AG	AA	AA	GG	AG	AA
B3	chrB3.3866951	2524902	GG	GG	GG	GG	GG	GG	GG
B3	chrB3.4231924	2717850	GA	GA	GG	GG	AA	GA	GG
B3	chrB3.4347231	2804973	GG	AG	GG	GG	AA	GG	GG
B3	chrB3.4388462	2841421	AG	AG	AA	AA	GG	AG	AA
B3	chrB3.4450840	2892043	GG	GG	GG	GG	GG	GG	GG
B3	chrB3.4599781	3006564	GG	GG	GG	GG	AG	GG	GG
B3	chrB3.4693371	3071087	GG	AG	GG	GG	AA	AG	GG
B3	chrB3.4751409	3119190	AG	AG	AA	AA	GG	AG	AA
B3	chrB3.5049430	3365185	GG	GG	GG	GG	AG	GG	GG
B3	chrB3.5114918	3425214	GG	GG	GG	GG	GG	GG	0
B3	chrB3.5142204	3442000	GG	GG	GG	GG	GG	AG	0
B3	chrB3.5259330	3527811	GA	AA	AA	AA	AA	GA	AA
B3	chrB3.5329687	3593827	AC	AC	AA	AA	CC	AC	AA
B3	chrB3.5399053	3653898	AA	AA	AA	AA	AA	AA	AA
B3	chrB3.5741183	3873661	GA	GA	GG	GG	AA	GA	GG
B3	chrB3.5775676	3902026	AA	GA	AA	AA	GA	AA	AA
B3	chrB3.5850492	3958124	AA	AA	AA	AA	AA	AA	AA
B3	chrB3.5985231	4081756	GG	AG	GG	GG	AG	GG	GG
B3	chrB3.6029736	4104455	AA	AA	AA	AA	AA	AA	AA
B3	chrB3.6317687	4329313	AA	GA	AA	AA	GA	AA	AA
B3	chrB3.6437206	4426759	AG	GG	GG	GG	GG	GG	GG
B3	chrB3.6542921	4506799	AA	AA	AA	AA	AA	AA	AA
B3	chrB3.6619446	4568440	AG	AG	AA	AA	GG	AG	AA
B3	chrB3.6693159	4629698	GG	AG	GG	GG	AA	AG	GG
B3	chrB3.6777344	4702449	AA	GA	AA	AA	GA	AA	AA
B3	chrB3.6835020	4747928	AA	AA	AA	AA	GA	GA	AA
B3	chrB3.6870673	4771842	GG	GG	GG	GG	GG	GG	GG
B3	chrB3.6901074	4797249	AA	AA	AA	AA	CA	CA	AA
B3	chrB3.7068602	4921170	AC	AC	CC	CC	AA	AC	CC
B3	chrB3.7138427	4971850	AG	AG	GG	GG	AG	AG	GG
B3	chrB3.7214729	5031335	GG	GG	GG	GG	GG	GG	GG
B3	chrB3.7215294	5031900	GA	GA	AA	AA	GA	GA	AA
B3	chrB3.7420655	5195978	GA	AA	AA	AA	AA	GA	AA
B3	chrB3.7506675	5255951	AG	GG	GG	GG	AG	AG	GG
B3	chrB3.7535896	5278979	GA	GA	GG	GG	AA	GA	GG
B3	chrB3.7600331	5339762	AA	AA	AA	AA	AA	AA	AA
B3	FES.280	5364274	CC	CC	CC	CC	CC	CC	CC
B3	FES.160	5364396	GG	GG	GG	GG	GG	GG	GG
B3	FES.156	5364400	AA	AA	AA	AA	AA	AA	AA
B3	FES.150	5364406	GG	GG	GG	GG	GG	GG	GG
B3	chrB3.7720172	5448735	AG	AG	AA	AA	AG	AG	AA
B3	chrB3.8139108	5783066	AG	GG	GG	GG	GG	GG	GG
B3	chrB3.8321019	5937154	AC	AC	CC	CC	AA	AC	0
B3	chrB3.8509631	6088367	GG	GG	GG	GG	AG	AG	GG
B3	chrB3.8555453	6134560	GG	GG	GG	GG	GG	AG	GG
B3	chrB3.8584073	6156656	GG	GG	GG	GG	GG	GG	GG
B3	chrB3.8653399	6202786	GG	GG	GG	GG	GG	GG	GG
B3	chrB3.8689528	6233741	CC	AC	CC	CC	AC	AC	CC
B3	chrB3.8750265	6278832	GA	GA	GG	GG	AA	GA	GG
B3	chrB3.8798554	6316525	GG	AG	GG	GG	AG	GG	GG
B3	chrB3.8849035	6360948	GA	GA	GG	GG	AA	GG	GG
B3	chrB3.8890714	6385608	AG	AG	GG	GG	AG	GG	GG
B3	chrB3.8949219	6442114	GG	GG	GG	GG	GG	GG	GG
B3	chrB3.9103045	6567301	GA	AA	AA	AA	AA	AA	AA
B3	chrB3.9180366	6641066	GG	GG	GG	GG	GG	GG	GG
B3	chrB3.9216728	6672661	AG	GG	GG	GG	GG	GG	GG
B3	chrB3.9307523	6745377	AA	GA	AA	AA	GG	GA	AA
B3	chrB3.9343176	6768154	GG	GG	GG	GG	GG	GG	GG
B3	chrB3.9369020	6793264	GG	GG	GG	GG	GG	GG	GG
B3	chrB3.9416143	6834735	AA	GA	AA	AA	GA	AA	AA
B3	chrB3.9488022	6897559	AG	AG	AA	AA	GG	AG	AA
B3	chrB3.9516752	6924011	AA	GA	AA	AA	GA	AA	AA
B3	chrB3.9565607	6962471	AG	AG	AA	AA	GG	AA	AA
B3	chrB3.9656355	7038563	AA	AA	AA	AA	AA	AA	AA
B3	chrB3.9722754	7094041	GA	GA	AA	AA	GG	AA	AA
B3	chrB3.9748670	7115654	GG	GG	GG	GG	0	GG	GG
B3	chrB3.9880240	7234656	AG	AG	AA	AA	GG	AG	AA
B3	chrB3.9914309	7268698	AG	AG	GG	GG	AG	GG	GG
B3	chrB3.9942316	7272142	GG	GG	GG	GG	AG	AG	GG
B3	chrB3.9957417	7287742	AA	AA	AA	AA	AA	GA	AA
B3	chrB3.10067310	7358714	AA	AA	AA	AA	AA	AA	AA
B3	chrB3.10102431	7393824	AA	AA	AA	AA	AA	GA	AA
B3	chrB3.10142369	7433757	GA	GA	AA	AA	GG	AA	AA
B3	chrB3.10169200	7439779	GG	GG	GG	GG	GG	GG	GG
B3	chrB3.10231303	7501111	GG	AG	GG	GG	AG	GG	GG
B3	chrB3.10315567	7579666	CC	CC	CC	CC	CC	CC	CC
B3	chrB3.10358533	7607252	AC	CC	CC	CC	CC	CC	CC
B3	chrB3.10385665	7627972	CC	CC	CC	CC	AC	CC	CC
B3	chrUn.48184357	7677088	GA	GA	GG	GG	AA	GA	GG
B3	chrB3.10445646	7677427	AG	GG	GG	GG	GG	GG	GG
B3	chrB3.10483488	7710894	CA	CA	CC	CC	AA	CA	CC
B3	chrB3.10510119	7727522	GG	GG	GG	GG	GG	GG	GG
B3	chrB3.10552220	7763025	GG	AG	GG	GG	AA	AG	GG
B3	chrB3.10578426	7788605	CC	CC	CC	CC	CC	AC	CC
B3	chrB3.10632446	7835194	AA	AA	AA	AA	AA	AA	AA
B3	chrB3.10667390	7862946	GA	AA	AA	AA	AA	AA	AA
B3	chrB3.10702267	7895949	AA	AA	AA	AA	AA	AA	AA
B3	chrB3.10732393	7920808	AA	AA	AA	AA	AA	AA	AA
B3	chrB3.10764068	7949099	GG	GG	GG	GG	GG	AG	GG
B3	chrB3.10814356	7991841	GG	GG	GG	GG	GG	GG	GG
B3	chrB3.10849777	8025496	GG	GG	GG	GG	GG	GG	GG
B3	chrB3.10883074	8055026	GG	AG	GG	GG	AA	AG	GG
B3	chrB3.10936644	8085907	AG	GG	GG	GG	GG	GG	GG
B3	chrB3.10989967	8132088	GG	GG	GG	GG	GG	GG	GG
B3	chrB3.11050287	8170219	GG	GG	GG	GG	GG	GG	GG
B3	chrB3.11081058	8201074	GA	GA	GG	GG	AA	GA	GG
B3	chrB3.11175732	8275616	GG	GG	GG	GG	GG	GG	GG
B3	chrB3.11205502	8300169	AC	AC	CC	CC	AA	AC	CC
B3	chrB3.11266385	8343180	GG	GG	GG	GG	GG	GG	GG
B3	chrB3.11312958	8384526	AA	AA	AA	AA	AA	AA	AA
B3	chrB3.11344435	8411728	AA	AA	AA	AA	AA	AA	AA
B3	chrB3.11384596	8447506	GG	AG	GG	GG	AA	GG	GG
	Homozygous region (bp)	6 312 950

## Sheet: Chr C1
		Status	Healthy carrier	Healthy carrier	Affected	Affected	Non carrier	Putative healthy carrier	Non affected
Chr	SNP	Position (bp)	Dam	Sire	Proband	Brother	Grandfather	Grandmother	Proband's littermate
C1	chrC1.195480335	177694120	CC	CC	CC	CC	CC	CC	CC
C1	chrC1.195563611	177764733	AA	AA	AA	AA	AA	AA	AA
C1	chrC1.195611067	177803288	GA	AA	AA	AA	AA	AA	GA
C1	chrC1.195687242	177863960	AA	AA	AA	AA	AA	AA	AA
C1	chrC1.195717454	177893720	GA	AA	AA	AA	AA	AA	GA
C1	chrC1.195757094	177925721	CA	AA	AA	AA	AA	AA	CA
C1	chrC1.195784312	177947703	GA	AA	AA	AA	AA	AA	GA
C1	chrC1.195819395	177982711	AC	CC	CC	CC	CC	CC	AC
C1	chrC1.195869797	178022704	GA	GA	AA	AA	AA	GA	GA
C1	chrC1.195911135	178056652	AG	AG	GG	GG	GG	AG	AG
C1	chrC1.195947457	178092917	GG	GG	GG	GG	GG	GG	GG
C1	chrC1.196020590	178142991	CC	CC	CC	CC	CC	CC	CC
C1	chrC1.196131286	178237451	GG	GG	GG	GG	GG	GG	GG
C1	chrC1.196220198	178320638	AG	GG	GG	GG	GG	AG	AG
C1	chrC1.196240309	178340726	GG	GG	GG	GG	GG	AG	GG
C1	chrC1.196281112	178375207	AA	AA	AA	AA	AA	GA	AA
C1	chrC1.196311190	178399663	AA	AA	AA	AA	AA	CA	AA
C1	chrC1.196354494	178427814	CC	CC	CC	CC	CC	CC	CC
C1	chrC1.196447071	178508910	GG	GG	GG	GG	GG	AG	GG
C1	chrC1.196477945	178532596	AA	AA	AA	AA	AA	GA	AA
C1	chrC1.196555631	178595908	AA	GA	AA	AA	AA	GG	AA
C1	chrC1.196640799	178658299	GA	GA	AA	AA	AA	GG	GA
C1	chrC1.196696770	178707895	AA	AA	AA	AA	AA	AA	AA
C1	chrC1.196758184	178753656	AG	GG	GG	GG	GG	GG	AG
C1	chrC1.196898840	178867313	GA	AA	AA	AA	AA	GA	GA
C1	chrC1.196931989	178890368	GA	AA	AA	AA	AA	AA	GA
C1	chrC1.197026400	178959890	GA	AA	AA	AA	AA	AA	AA
C1	chrC1.197060149	178987317	AA	GA	AA	AA	AA	GG	AA
C1	chrC1.197097837	179018638	AA	GA	AA	AA	AA	GG	AA
C1	chrC1.197182188	179081367	GA	GA	AA	AA	AA	GG	AA
C1	chrC1.197244460	179132819	GA	AA	AA	AA	AA	GA	AA
C1	chrC1.197309471	179191307	GG	GG	GG	GG	GG	GG	GG
C1	chrC1.197344487	179221292	0	AA	AA	AA	AA	GA	AA
C1	chrC1.197387573	179255997	AG	GG	GG	GG	GG	GG	GG
C1	chrC1.197429214	179276538	AG	GG	GG	GG	GG	AG	GG
C1	chrC1.197480073	179327653	GG	GG	GG	GG	GG	AG	GG
C1	chrC1.197508479	179354660	CA	CA	AA	AA	AA	CC	AA
C1	chrC1.197548964	179391623	AA	AA	AA	AA	AA	CA	AA
C1	chrC1.197577145	179417150	GG	GG	GG	GG	GG	AG	GG
C1	chrC1.197605606	179442905	CA	AA	AA	AA	AA	AA	AA
C1	chrC1.197635674	179471268	AA	AA	AA	AA	AA	AA	AA
C1	chrC1.197689504	179513926	AG	GG	GG	GG	GG	AG	GG
C1	chrC1.197717187	179537822	AG	GG	GG	GG	GG	GG	GG
C1	chrC1.197745433	179559503	AG	GG	GG	GG	GG	GG	GG
C1	chrC1.197813297	179610153	AA	AA	AA	AA	AA	AA	AA
C1	chrC1.197838789	179635040	AA	AA	AA	AA	AA	AA	AA
C1	chrC1.197934547	179716519	CC	AC	AC	AC	AC	AC	AC
C1	chrC1.197966030	179744285	GA	AA	AA	AA	AA	AA	AA
C1	chrC1.197985506	179763073	GA	AA	AA	AA	AA	AA	AA
C1	chrC1.198031626	179796926	AG	GG	GG	GG	GG	GG	GG
C1	chrC1.198064122	179821776	GG	GG	GG	GG	GG	GG	GG
C1	chrC1.198155868	179891211	AG	GG	GG	GG	GG	GG	GG
C1	chrC1.198237032	179964207	GA	AA	AA	AA	AA	AA	AA
C1	chrC1.198272932	179993280	AG	GG	GG	GG	GG	GG	GG
C1	chrC1.198349855	180053628	AA	AA	AA	AA	AA	AA	AA
C1	chrC1.198375884	180079216	GA	AA	AA	AA	AA	AA	AA
C1	chrC1.198401436	180092090	GG	GG	GG	GG	GG	GG	GG
C1	chrC1.198533629	180208838	AA	AA	AA	AA	AA	AA	AA
C1	chrC1.198626348	180278020	AG	GG	GG	GG	GG	GG	GG
C1	chrC1.198666775	180318779	AA	AA	AA	AA	AA	AA	AA
C1	chrC1.198699559	180347022	AG	GG	GG	GG	GG	GG	GG
C1	chrC1.198888922	180517725	GG	GG	GG	GG	GG	GG	GG
C1	chrC1.199042193	180658181	AA	CA	AA	AA	AA	CC	AA
C1	chrC1.199085053	180697598	AA	CA	AA	AA	AA	CC	AA
C1	chrC1.199117236	180725089	AA	GA	AA	AA	AA	GG	AA
C1	chrC1.199297934	180883421	GG	AG	GG	GG	GG	AG	GG
C1	chrC1.199354719	180935813	CC	AC	CC	CC	CC	AA	CC
C1	chrC1.199377863	180955269	AA	GA	AA	AA	AA	GA	AA
C1	chrC1.199388870	180964383	AA	AA	AA	AA	AA	GA	AA
C1	chrC1.199492871	181051921	GG	GG	GG	GG	GG	GG	GG
C1	chrC1.199526609	181077741	AG	GG	GG	GG	GG	AG	GG
C1	chrC1.199568888	181102582	GA	AA	AA	AA	AA	GA	AA
C1	chrC1.199632497	181158045	GA	AA	AA	AA	AA	GA	AA
C1	chrC1.199661970	181183648	GA	AA	AA	AA	AA	GA	AA
C1	chrC1.199727310	181249658	AG	GG	GG	GG	GG	AG	GG
C1	chrUn.48228095	181270484	AG	GG	GG	GG	GG	AG	GG
C1	chrC1.199755762	181280363	GA	AA	AA	AA	AA	GA	AA
C1	chrC1.199883679	181381690	CA	AA	AA	AA	AA	AA	AA
C1	chrC1.199944411	181432179	GA	AA	AA	AA	AA	GA	AA
C1	chrC1.199993399	181481915	GG	AG	GG	GG	GG	AG	GG
C1	chrC1.200058240	181544012	CC	CC	CC	CC	CC	CC	CC
C1	chrC1.200097052	181575613	AA	GA	AA	AA	AA	GA	AA
C1	chrC1.200125352	181602536	AA	GA	AA	AA	AA	GA	AA
C1	chrC1.200566067	181981473	AA	GA	AA	AA	AA	GG	AA
C1	chrC1.200590211	182004166	GG	AG	GG	GG	GG	AA	GG
C1	chrC1.200617599	182031081	AA	GA	AA	AA	AA	GG	AA
C1	chrUn.39690898	182157959	GA	GA	AA	AA	AA	GG	AA
C1	chrC1.200904857	182263407	AA	GA	AA	AA	AA	GG	AA
C1	chrC1.200948147	182295967	AA	GA	AA	AA	AA	GA	AA
C1	chrC1.200981417	182321614	AA	CA	AA	AA	AA	CC	AA
C1	chrC1.201005856	182343635	AG	GG	GG	GG	GG	AG	GG
C1	chrC1.201097181	182420312	AA	AA	AA	AA	AA	AA	AA
C1	chrC1.201251744	182552139	AG	AG	GG	GG	GG	AA	GG
C1	chrC1.201346041	182618540	CC	CC	CC	CC	CC	AC	CC
C1	chrC1.201384643	182649292	AA	AA	AA	AA	AA	CA	AA
C1	chrC1.201410874	182662602	AG	AG	GG	GG	GG	AG	GG
C1	chrC1.201500179	182741800	GA	GA	AA	AA	AA	GA	AA
C1	chrC1.201623076	182833605	CC	CC	CC	CC	CC	CC	CC
C1	chrC1.201761569	182948661	GA	GA	AA	AA	AA	GG	AA
C1	chrC1.201830802	183015114	AG	AG	GG	GG	GG	AA	GG
C1	chrC1.201857792	183037963	AA	AA	AA	AA	AA	AA	AA
C1	chrC1.201911795	183089956	AC	AC	CC	CC	CC	AA	CC
C1	chrC1.201942700	183113396	AA	AA	AA	AA	AA	GA	AA
C1	chrC1.201976968	183147047	AA	AA	AA	AA	AA	GA	AA
C1	chrC1.202003407	183154254	GA	GA	AA	AA	AA	GG	AA
C1	chrC1.202048744	183196922	AA	AA	AA	AA	AA	AA	AA
C1	chrC1.202058234	183202056	GA	AA	AA	AA	AA	GA	AA
C1	chrC1.202075804	183212783	GG	AG	GG	GG	GG	AG	GG
C1	chrC1.202212912	183321506	CA	CA	AA	AA	AA	CC	AA
C1	chrC1.202271028	183372773	CA	CA	AA	AA	AA	CC	AA
C1	chrC1.202366213	183449535	AA	AA	AA	AA	AA	AA	AA
C1	chrC1.202493002	183558962	CC	AC	CC	CC	CC	AA	CC
C1	chrC1.202737258	183640911	GG	GG	GG	GG	GG	AG	GG
C1	chrC1.202770816	183672502	CC	AC	CC	CC	CC	AA	CC
C1	chrC1.202822232	183715444	AG	AG	GG	GG	GG	AG	GG
C1	chrC1.202860978	183731190	GG	GG	GG	GG	GG	AG	GG
C1	chrC1.202926369	183784612	AA	AA	AA	AA	AA	GA	AA
C1	chrC1.202997630	183848326	GA	GA	AA	AA	AA	GG	AA
C1	chrC1.203072031	183909870	GA	GA	AA	AA	AA	GA	AA
C1	chrC1.203210252	184024289	AG	GG	GG	GG	GG	GG	GG
C1	chrC1.203281636	184084022	GG	GG	GG	GG	GG	AG	GG
C1	chrC1.203317797	184115118	AG	GG	GG	GG	GG	GG	GG
C1	chrC1.203348154	184142867	AG	GG	GG	GG	GG	GG	GG
C1	chrC1.203375665	184157840	CA	AA	AA	AA	AA	AA	AA
C1	chrC1.203473809	184233976	AA	AA	AA	AA	AA	CA	AA
C1	chrC1.203499759	184249110	AA	AA	AA	AA	AA	GA	AA
C1	chrUn.19785766	184291112	AA	AA	AA	AA	AA	AA	AA
C1	chrC1.203552435	184294797	AA	AA	AA	AA	AA	AA	AA
C1	chrC1.203591751	184322133	GG	GG	GG	GG	GG	AG	GG
C1	chrC1.203648033	184367802	GG	GG	GG	GG	GG	GG	GG
C1	chrC1.203721930	184425399	GG	GG	GG	GG	GG	GG	GG
C1	chrC1.203778198	184471636	AG	AG	GG	GG	GG	AG	GG
C1	chrC1.203842207	184525184	GA	GA	AA	AA	AA	GG	AA
C1	chrC1.203891319	184568409	AG	AG	GG	GG	GG	AG	GG
C1	chrC1.203989380	184647615	AG	GG	GG	GG	GG	AG	GG
C1	chrC1.204049167	184695759	AG	AG	GG	GG	GG	AA	GG
C1	chrC1.204086766	184711219	AC	AC	CC	CC	CC	AA	CC
C1	chrC1.204142365	184757674	AA	AA	AA	AA	AA	GA	AA
C1	chrX.81539042	184794679	GA	GA	AA	AA	AA	GG	AA
C1	chrUn.77837390	184962076	AG	GG	GG	GG	GG	GG	GG
C1	chrC1.204393574	184966543	GA	AA	AA	AA	AA	AA	AA
C1	chrC1.204488039	185050208	AA	CA	AA	AA	AA	CC	AA
C1	chrC1.204553733	185111315	AA	AA	AA	AA	AA	AA	AA
C1	chrC1.204620188	185175027	AA	AA	AA	AA	AA	CA	AA
C1	chrC1.204646301	185186626	GG	AG	GG	GG	GG	AG	GG
C1	chrC1.204712414	185253401	AA	AA	AA	AA	AA	AA	AA
C1	chrC1.204751975	185264885	AA	GA	AA	AA	AA	GA	AA
C1	chrC1.204818668	185320986	GA	AA	AA	AA	AA	GA	AA
C1	chrC1.204857245	185347420	GA	GA	AA	AA	AA	GG	AA
C1	chrC1.204986059	185451035	GG	GG	GG	GG	GG	GG	GG
C1	chrC1.205047659	185500940	AG	GG	GG	GG	GG	AG	GG
C1	chrC1.205087462	185537580	GG	GG	GG	GG	GG	AG	GG
C1	chrC1.205126359	185570490	GA	AA	AA	AA	AA	AA	AA
C1	chrC1.205258591	185684356	GA	AA	AA	AA	AA	AA	AA
C1	chrC1.205302728	185705477	AA	AA	AA	AA	AA	AA	AA
C1	chrE3.12218117	185733097	AG	GG	GG	GG	GG	GG	GG
C1	chrC1.205449104	185827267	GA	AA	AA	AA	AA	AA	AA
C1	chrC1.205628466	185999620	AA	GA	AA	AA	AA	GG	AA
C1	chrC1.205669026	186039275	CC	CC	CC	CC	CC	AC	CC
C1	chrC1.205730371	186079534	GA	GA	AA	AA	AA	GG	AA
C1	chrUn.73882755	186186058	CC	CC	CC	CC	CC	GC	CC
C1	chrC1.205858886	186187348	AA	AA	AA	AA	AA	AA	AA
C1	chrC1.205916348	186231564	GG	AG	GG	GG	GG	AG	GG
C1	chrC1.205973066	186269566	AA	GA	AA	AA	AA	GG	AA
C1	chrC1.206005377	186297068	GG	GG	GG	GG	GG	GG	GG
C1	chrC1.206055530	186342444	AA	GA	AA	AA	AA	GA	AA
C1	chrC1.206083216	186348976	AA	CA	AA	AA	AA	CC	AA
C1	chrC1.206117085	186372386	GG	GG	GG	GG	GG	AG	GG
C1	chrC1.206172950	186421418	GG	GG	GG	GG	GG	AG	GG
C1	chrC1.206244306	186483619	GG	GG	GG	GG	GG	AG	GG
C1	chrE2.16025852	186511795	GG	AG	GG	GG	GG	AG	GG
C1	chrC1.206275996	186518197	GA	AA	AA	AA	AA	GA	AA
C1	chrE2.15824682	186608968	GG	AG	GG	GG	GG	AG	GG
C1	chrE2.15824523	186609127	AA	GA	AA	AA	AA	GA	AA
C1	chrE2.15788298	186620010	GA	GA	AA	AA	AA	GG	AA
C1	chrC1.206390145	186644792	AA	GA	AA	AA	AA	GA	AA
C1	chrC1.206417639	186671157	AA	AA	AA	AA	AA	GA	AA
C1	chrE2.15664010	186690869	CA	AA	AA	AA	AA	CA	AA
C1	chrC1.206467759	186726885	GG	GG	GG	GG	GG	AG	GG
C1	chrC1.206468028	186727154	AG	GG	GG	GG	GG	AG	GG
C1	chrC1.206534993	186770416	AA	AA	AA	AA	AA	AA	AA
C1	chrC1.206572887	186801280	AC	CC	CC	CC	CC	AC	CC
C1	chrC1.206613665	186831547	GG	GG	GG	GG	GG	GG	GG
C1	chrC1.206705575	186900923	AG	AG	GG	GG	GG	AA	GG
C1	chrC1.206737769	186952899	GG	GG	GG	GG	GG	GG	GG
C1	chrC1.206767765	186957865	GG	AG	GG	GG	GG	AG	GG
C1	chrC1.206814723	187015686	GA	AA	AA	AA	AA	AA	AA
C1	chrC1.206844237	187051294	AA	GA	AA	AA	AA	GA	AA
C1	chrC1.206893621	187083515	AG	GG	GG	GG	GG	GG	GG
C1	chrC1.206937316	187129726	AA	GA	AA	AA	AA	GA	AA
C1	chrC1.207015639	187203311	GG	GG	GG	GG	GG	GG	GG
C1	chrC1.207119060	187280704	AA	AA	AA	AA	AA	AA	AA
C1	chrC1.207150363	187303003	AG	GG	GG	GG	GG	AG	GG
C1	chrC1.207253983	187399488	AA	AA	AA	AA	AA	AA	AA
C1	chrC1.207295994	187446721	GG	GG	GG	GG	GG	GG	GG
C1	chrC1.207376337	187537683	AC	AC	CC	CC	CC	AA	CC
C1	chrC1.207402846	187564078	AG	GG	GG	GG	GG	GG	GG
C1	chrC1.207418290	187579512	CA	AA	AA	AA	AA	AA	AA
C1	chrC1.207459955	187606036	AA	CA	AA	AA	AA	CC	AA
C1	chrC1.207534452	187669683	GA	AA	AA	AA	AA	AA	AA
C1	chrC1.207565177	187695250	CC	CC	CC	CC	CC	CC	CC
C1	chrC1.207615727	187736932	AA	AA	AA	AA	AA	AA	AA
C1	chrC1.207677061	187794522	AG	GG	GG	GG	GG	GG	GG
C1	chrC1.207729095	187828716	AA	AA	AA	AA	AA	AA	AA
C1	chrC1.207794151	187879558	GA	AA	AA	AA	AA	GA	AA
C1	chrC1.207828137	187912255	AA	AA	AA	AA	AA	GA	AA
C1	chrC1.207888967	187954648	AG	AG	GG	GG	GG	AG	GG
C1	chrC1.207940990	188001802	AA	AA	AA	AA	AA	GA	AA
C1	chrC1.207973315	188027675	GA	AA	AA	AA	AA	GA	AA
C1	chrC1.208017387	188059663	AG	GG	GG	GG	GG	GG	GG
C1	chrC1.208086166	188115716	AA	AA	AA	AA	AA	GA	AA
C1	chrC1.208122067	188146732	GG	GG	GG	GG	GG	AG	GG
C1	chrC1.208168985	188179399	AA	AA	AA	AA	AA	AA	AA
C1	chrC1.208208667	188208039	GA	AA	AA	AA	AA	GA	AA
C1	chrC1.208351258	188328592	GA	AA	AA	AA	AA	GA	AA
C1	chrC1.208393455	188364556	GA	AA	AA	AA	AA	AA	AA
C1	chrC1.208418054	188385489	CC	CC	CC	CC	CC	CC	CC
C1	chrC1.208463888	188426885	GA	AA	AA	AA	AA	GA	AA
C1	chrC1.208524609	188486996	GG	GG	GG	GG	GG	AG	GG
C1	chrC1.208550834	188500941	AA	AA	AA	AA	AA	GA	AA
C1	chrC1.208593210	188539140	AG	GG	GG	GG	GG	GG	GG
C1	chrC1.208655106	188599318	CA	AA	AA	AA	AA	CA	AA
C1	chrC1.208686106	188621051	AA	GA	AA	AA	AA	GG	AA
C1	chrC1.208719994	188654835	AA	AA	AA	AA	AA	AA	AA
C1	chrC1.208771399	188682037	CC	AC	CC	CC	CC	AC	CC
C1	chrC1.208821212	188724098	CC	CC	CC	CC	CC	CC	CC
C1	chrC1.208860949	188754403	GA	GA	AA	AA	AA	GG	AA
C1	chrC1.208909452	188795492	AG	AG	GG	GG	GG	AA	GG
C1	chrC1.208938590	188818375	GA	GA	AA	AA	AA	GG	AA
C1	chrC1.208968085	188849484	GG	GG	GG	GG	GG	GG	GG
C1	chrC1.208994410	188867738	GG	GG	GG	GG	GG	GG	GG
C1	chrC1.209049647	188915508	AG	AG	GG	GG	GG	AA	GG
C1	chrC1.209097279	188951908	AA	AA	AA	AA	AA	AA	AA
C1	chrC1.209151706	188998839	GA	GA	AA	AA	AA	GG	AA
C1	chrC1.209241877	189054087	GG	GG	GG	GG	GG	GG	GG
C1	chrC1.209289904	189088506	AA	GA	AA	AA	AA	GG	AA
C1	chrC1.209323522	189116749	AA	GA	AA	AA	AA	GA	AA
C1	chrC1.209360037	189156139	AA	AA	AA	AA	AA	AA	AA
C1	chrC1.209393216	189180654	GG	AG	GG	GG	GG	AG	GG
C1	chrC1.209438288	189221748	AA	GA	AA	AA	AA	GA	AA
C1	chrC1.209472657	189250542	AA	AA	AA	AA	AA	GA	AA
C1	chrC1.209524877	189297041	AA	AA	AA	AA	AA	CA	AA
C1	chrC1.209593496	189347825	GG	GG	GG	GG	GG	GG	GG
C1	chrC1.209626544	189372575	AA	GA	AA	AA	AA	GA	AA
C1	chrC1.209651688	189395124	AA	CA	AA	AA	AA	CA	AA
C1	chrC1.209732389	189444521	GG	GG	GG	GG	GG	GG	GG
C1	chrC1.209768063	189476038	GG	GG	GG	GG	GG	AG	GG
C1	chrC1.209796634	189504895	AA	AA	AA	AA	AA	AA	AA
C1	chrC1.209866737	189557906	GG	AG	GG	GG	GG	AA	GG
C1	chrC1.209923034	189602635	AG	GG	GG	GG	GG	GG	GG
C1	chrC1.209961637	189622994	AG	GG	GG	GG	GG	GG	GG
C1	chrC1.210072742	189715333	AA	GA	AA	AA	AA	GA	AA
C1	chrC1.210149327	189783173	GG	AG	GG	GG	GG	AG	GG
C1	chrC1.210183922	189800633	GA	AA	AA	AA	AA	AA	AA
C1	chrC1.210300489	189899069	GA	GA	AA	AA	AA	GG	AA
C1	chrC1.210385574	189964509	GG	GG	GG	GG	GG	GG	GG
C1	chrC1.210409658	189988559	GA	AA	AA	AA	AA	GA	AA
C1	chrC1.210422117	189992867	AG	GG	GG	GG	GG	AG	GG
C1	chrC1.210462741	190026626	AA	AA	AA	AA	AA	AA	AA
C1	chrC1.210531208	190076198	GG	GG	GG	GG	GG	AG	GG
C1	chrC1.210610201	190141135	AA	GA	AA	AA	AA	GG	AA
C1	chrC1.210678008	190197412	AG	AG	GG	GG	GG	AA	GG
C1	chrC1.210739872	190258198	GG	GG	GG	GG	GG	GG	GG
C1	chrC1.210837119	190344358	AA	AA	AA	AA	AA	AA	AA
C1	chrC1.210868222	190372922	AG	GG	GG	GG	GG	GG	GG
C1	chrC1.210947139	190439482	GA	AA	AA	AA	AA	AA	AA
C1	chrC1.210987363	190471083	GG	GG	GG	GG	GG	GG	GG
C1	chrC1.211011601	190495335	AG	AG	GG	GG	GG	AA	GG
C1	chrC1.211052687	190528679	GA	GA	AA	AA	AA	GG	AA
	Homozygous region (bp)	12 834 559

## Sheet: Chr C2
		Status	Healthy carrier	Healthy carrier	Affected	Affected	Non carrier	Putative healthy carrier	Non affected
Chr	SNP	Position (bp)	Dam	Sire	Proband	Brother	Grandfather	Grandmother	Proband's littermate
C2	chrE1.51937626	118909905	C A	C A	A A	A A	C A	A A	A A
C2	chrUn23.1506438	119132790	A G	A G	G G	G G	A G	G G	G G
C2	chrUn.23987902	119320659	A G	A G	G G	G G	A G	G G	G G
C2	chrUn23.1217310	119425432	A A	A A	A A	A A	A A	A A	A A
C2	chrUn23.1148961	119493665	A G	A G	G G	G G	A G	G G	G G
C2	chrUn23.1038088	119602059	A A	A A	A A	A A	A A	A A	A A
C2	chrUn23.780768	119883323	G G	G G	G G	G G	G G	G G	G G
C2	chrUn23.759840	119902697	A G	A G	G G	G G	A G	G G	G G
C2	chrUn23.722732	119937921	A A	A A	A A	A A	A A	A A	A A
C2	chrUn23.688433	119973080	A G	A G	G G	G G	A G	G G	G G
C2	chrUn23.611604	120048830	A G	A G	G G	G G	A G	G G	G G
C2	chrUn23.576658	120086697	C C	C C	C C	C C	C C	C C	C C
C2	chrUn23.549415	120114241	G A	G A	A A	A A	G A	A A	A A
C2	chrUn23.496162	120165688	G A	G A	A A	A A	G A	A A	A A
C2	chrUn23.403963	120255776	G G	G G	G G	G G	G G	G G	G G
C2	chrC2.131268964	120452396	G A	G A	A A	A A	G A	A A	A A
C2	chrC2.131309365	120489154	G G	G G	G G	G G	G G	G G	G G
C2	chrD2.23962523	120506927	G G	G G	G G	G G	G G	G G	G G
C2	chrD1.87318335	120562788	A G	A G	G G	G G	A G	G G	G G
C2	chrC2.131531541	120683053	A G	A G	G G	G G	A G	G G	G G
C2	chrC2.131565774	120716883	A A	A A	A A	A A	A A	A A	A A
C2	chrC2.131584033	120735081	G A	G A	A A	A A	G A	A A	A A
C2	chrC2.131608405	120755483	A A	A A	A A	A A	A A	A A	A A
C2	chrC2.131684215	120819040	G A	G A	A A	A A	G A	A A	A A
C2	chrC2.131723744	120847518	A A	A A	A A	A A	A A	A A	A A
C2	chrC2.131787922	120900654	A G	A G	G G	G G	A G	G G	G G
C2	chrC2.131965796	121055280	A A	A A	A A	A A	A A	A A	A A
C2	chrC2.132128594	121187173	G G	G G	G G	G G	G G	G G	G G
C2	chrC2.132203113	121253603	A C	A C	C C	C C	A C	C C	C C
C2	chrC2.132254600	121292778	A G	A G	G G	G G	A G	G G	G G
C2	chrC2.132356611	121360400	A A	A A	A A	A A	A A	A A	A A
C2	chrC2.132468780	121457160	A A	A A	A A	A A	A A	A A	A A
C2	chrC2.132493886	121466954	C C	C C	C C	C C	C C	C C	C C
C2	chrC2.132581209	121534326	G G	G G	G G	G G	G G	G G	G G
C2	chrC2.132605477	121551317	A A	A A	A A	A A	A A	A A	A A
C2	chrC2.132830026	121742463	G A	G A	A A	A A	G A	G A	A A
C2	chrC2.132895524	121787191	A A	A A	A A	A A	A A	G A	A A
C2	chrC2.132975238	121854944	G A	G A	A A	A A	G A	G A	A A
C2	chrC2.133014246	121891450	C C	C C	C C	C C	C C	A C	C C
C2	chrC2.133046677	121922085	A G	A G	G G	G G	A G	A G	G G
C2	chrC2.133074408	121938416	A A	A A	A A	A A	A A	A A	A A
C2	chrC2.133137775	121993662	A G	A G	G G	G G	A G	A G	G G
C2	chrC2.133209239	122049043	A G	A G	G G	G G	A G	G G	G G
C2	chrC2.133242594	122072912	A G	A G	G G	G G	A G	G G	G G
C2	chrC2.133309366	122090253	A G	A G	G G	G G	A G	G G	G G
C2	chrC2.133391324	122172214	C A	C A	A A	A A	C A	A A	A A
C2	chrC2.133457141	122185429	G G	G G	G G	G G	G G	G G	0
C2	chrC2.133564584	122273316	G G	G G	G G	G G	G G	G G	G G
C2	chrC2.133648261	122338962	C C	C C	C C	C C	C C	C C	C C
C2	chrC2.133698529	122387678	C C	C C	C C	C C	C C	C C	C C
C2	chrC2.133754267	122433569	A G	A G	G G	G G	A G	A G	G G
C2	chrC2.133926827	122569085	C A	C A	A A	A A	C A	A A	A A
C2	chrC2.133927463	122569720	G A	G A	A A	A A	G A	A A	A A
C2	chrC2.133951390	122580552	A A	A A	A A	A A	A A	G A	A A
C2	chrC2.133978543	122600358	A A	A A	A A	A A	A A	G A	A A
C2	chrC2.134070160	122678881	C A	C A	A A	A A	C A	C A	A A
C2	chrC2.134094950	122690179	G A	G A	A A	A A	G A	G A	A A
C2	chrC2.134127150	122718140	G G	G G	G G	G G	G G	G G	G G
C2	chrC2.134166571	122740895	A G	A G	A A	A A	A G	A G	A A
C2	chrC2.134308201	122862363	A A	A A	A A	A A	A A	G A	A A
C2	chrC2.134342823	122891375	A C	A C	C C	C C	A C	C C	C C
C2	chrC2.134385840	122919304	G G	G G	G G	G G	G G	A G	G G
C2	chrC2.134535017	123037423	G A	G A	A A	A A	G A	G A	A A
C2	chrC2.134590052	123082230	C A	C A	C C	C C	C A	C A	C C
C2	chrC2.134646539	123132063	G G	G G	G G	G G	G G	A G	G G
C2	chrC2.134680039	123161074	G G	G G	G G	G G	G G	A G	G G
C2	chrC2.134748979	123214350	G G	G G	G G	G G	G G	A G	G G
C2	chrC2.134824277	123282663	G G	G G	G G	G G	G G	A G	G G
C2	chrC2.134885790	123333994	G A	G A	A A	A A	G A	G A	A A
C2	chrC2.134921765	123353207	G G	G G	G G	G G	G G	A G	G G
C2	chrC2.135054081	123447849	G G	G G	G G	G G	G G	A G	G G
C2	chrC2.135122379	123494656	A G	A G	G G	G G	A G	G G	G G
C2	chrC2.135183042	123543577	G A	G A	A A	A A	G A	A A	A A
C2	chrC2.135212316	123568783	G A	G A	A A	A A	G A	A A	A A
C2	chrC2.135258814	123602333	G A	G A	A A	A A	G A	A A	A A
C2	chrC2.135384868	123696034	A A	A A	A A	A A	A A	A A	A A
C2	chrC2.135563693	123816653	G A	G A	A A	A A	G A	G A	A A
C2	chrC2.135671477	123905040	G A	G A	A A	A A	G A	A A	A A
C2	chrC2.135819538	124012565	G A	G A	A A	A A	G A	A A	A A
C2	chrC2.135896253	124077709	A A	A A	A A	A A	A A	A A	A A
C2	chrC2.135947102	124108504	A A	A A	A A	A A	A A	A A	A A
C2	chrC2.135995112	124147253	G A	G A	A A	A A	G A	A A	A A
C2	chrC2.136079303	124222155	G A	G A	A A	A A	G A	G A	A A
C2	chrC2.136109561	124247329	A G	A G	G G	G G	A G	A G	G G
C2	chrC2.136215391	124324142	C A	C A	A A	A A	C A	A A	A A
C2	chrC2.136293011	124404370	A G	A G	G G	G G	A G	G G	G G
C2	chrC2.136375670	124484637	A G	A G	G G	G G	A G	G G	G G
C2	chrC2.136401067	124487789	C A	C A	C C	C C	A A	C C	C C
C2	chrC2.136474650	124546918	G A	G A	A A	A A	G G	A A	A A
C2	chrUn.9012548	124636132	A G	A G	G G	G G	A G	G G	G G
C2	chrC2.136706813	124767787	G A	G A	A A	A A	G A	A A	A A
C2	chrC2.136767429	124814449	A G	A G	G G	G G	A A	G G	G G
C2	chrC2.136798396	124834626	A G	A G	G G	G G	A G	G G	G G
C2	chrC2.136857884	124887186	G A	G A	A A	A A	G A	A A	A A
C2	chrC2.136914105	124930985	A A	A A	A A	A A	A A	G A	A A
C2	chrC2.136965861	124960486	A G	A G	G G	G G	A G	G G	G G
C2	chrC2.137060736	125049766	G G	G G	G G	G G	A G	A G	G G
C2	chrC2.137085623	125067056	G G	G G	0	G G	A G	G G	A G
C2	chrC2.137131478	125105013	A A	A A	A A	A A	C A	C A	A A
C2	chrC2.137188637	125140500	A A	A A	A A	A A	G A	G A	A A
C2	chrC2.137219915	125166541	A A	A A	A A	A A	A A	C A	A A
C2	chrC2.137319860	125240112	G G	G G	G G	G G	G G	G G	G G
C2	chrC2.137405062	125292932	G G	G G	G G	G G	A G	A G	G G
C2	chrC2.137470283	125365374	A G	A G	G G	G G	A G	G G	G G
C2	chrC2.137475575	125370663	A G	A G	G G	G G	A G	G G	G G
C2	chrC2.137504320	125392065	G A	G A	A A	A A	G A	A A	A A
C2	chrC2.137536579	125416844	A A	A A	A A	A A	C A	C A	A A
C2	chrB1.59969606	125424986	G G	G G	G G	G G	G G	A G	G G
C2	chrC2.137577344	125444699	A A	A A	A A	A A	G A	G A	A A
C2	chrC2.137716390	125561041	A A	A A	A A	A A	G A	G A	A A
C2	chrC2.137906488	125754486	G G	G G	G G	G G	A G	A G	G G
C2	chrC2.137970815	125802628	A A	A A	A A	A A	G A	G A	0
C2	chrC2.138132396	125916477	C C	C C	C C	C C	A C	A C	C C
C2	chrC2.138192780	125971106	G G	G G	G G	G G	A G	A G	G G
C2	chrC2.138279983	126035070	C C	C C	C C	C C	C C	A C	C C
C2	chrC2.138307611	126059269	G G	G G	G G	G G	G G	A G	G G
C2	chrC2.138338903	126081959	A A	A A	A A	A A	A A	G A	A A
C2	chrC2.138437627	126179118	A A	A A	A A	A A	G A	G A	A A
C2	chrC2.138522272	126239761	A A	A A	A A	A A	G A	G A	A A
C2	chrC2.138575705	126286267	C C	C C	C C	C C	A C	A C	C C
C2	chrC2.138640185	126337274	G G	G G	G G	G G	A G	G G	G G
C2	chrC2.138677506	126367620	G G	G G	G G	0	A G	G G	G G
C2	chrC2.138704931	126394801	G G	G G	G G	G G	A G	G G	G G
C2	chrC2.138762080	126440980	A A	A A	A A	A A	G A	G A	A A
C2	chrC2.138792361	126470279	A A	A A	A A	A A	A A	G A	A A
C2	chrC2.138822313	126497524	G G	G G	G G	G G	G G	A G	G G
C2	chrC2.138894615	126554975	A G	A G	A A	A A	A G	A G	A A
C2	chrC2.138944931	126606197	G G	G G	G G	G G	A G	G G	G G
C2	chrC2.138997882	126653699	G A	G A	A A	A A	G G	A A	A A
C2	chrC2.139031931	126680629	G A	G A	A A	A A	G A	A A	A A
C2	chrC2.139202016	126823111	G G	G G	G G	G G	A G	G G	G G
C2	chrC2.139223777	126838612	G A	G A	A A	A A	G G	A A	A A
C2	chrC2.139248858	126863807	G G	G G	G G	G G	G G	G G	G G
C2	chrC2.139278191	126885417	A A	A A	A A	A A	A A	A A	A A
C2	chrC2.139392388	126982778	A A	A A	A A	A A	G A	A A	A A
C2	chrC2.139423607	127005333	G A	G A	A A	A A	G A	G A	A A
C2	chrC2.139528957	127074960	C A	C A	C C	C C	A A	C A	C C
C2	chrC2.139568807	127110180	A G	A G	G G	G G	A G	A G	G G
C2	chrC2.139572168	127112225	G G	G G	G G	G G	A G	G G	G G
C2	chrC2.139636757	127174420	A A	A A	A A	A A	G A	A A	A A
C2	chrC2.139731861	127227008	G G	G G	G G	G G	A G	G G	G G
C2	chrC2.139860318	127326506	A G	A G	G G	G G	A A	G G	G G
C2	chrC2.139939394	127384083	A G	A G	G G	G G	A A	G G	G G
C2	chrC2.139979906	127416063	G G	G G	G G	G G	A G	G G	G G
C2	chrC2.140117543	127535200	A C	A C	C C	C C	A A	A C	C C
C2	chrC2.140118024	127535681	A G	A G	A A	A A	G G	A G	A A
C2	chrC2.140212437	127614089	A G	A G	G G	G G	A A	A G	G G
C2	chrC2.140238625	127640394	G A	G A	A A	A A	G G	G A	A A
C2	chrC2.140367067	127742843	A A	A A	A A	A A	A A	A A	0
C2	chrC2.140440680	127800531	C A	C A	A A	A A	C C	C A	A A
C2	chrC2.140471655	127835691	A G	A G	G G	G G	A A	A G	G G
C2	chrC2.140627268	127966975	G G	G G	G G	G G	A G	G G	G G
C2	chrC2.140663378	127995406	A A	A A	A A	A A	G A	A A	A A
C2	chrC2.140739235	128062576	A A	A A	A A	A A	G A	A A	0
C2	chrC2.140794819	128106971	A G	A G	G G	G G	A G	G G	G G
C2	chrC2.140852528	128168046	A G	A G	A A	A A	G G	A A	A A
C2	chrC2.140890438	128192494	G A	G A	A A	A A	G A	A A	A A
C2	chrC2.140914691	128211226	G A	G A	A A	A A	G A	A A	A A
C2	chrC2.140959540	128251893	C A	C A	A A	A A	C A	A A	A A
C2	chrC2.141004219	128268366	G A	G A	A A	A A	G A	A A	A A
C2	chrC2.141115996	128355071	A C	A C	C C	C C	A C	C C	C C
C2	chrC2.141229992	128443872	A G	A G	G G	G G	A G	G G	G G
C2	chrC2.141326140	128523470	A G	A G	G G	G G	A G	G G	G G
C2	chrC2.141352666	128534008	C A	C A	A A	A A	C A	A A	A A
C2	chrC2.141396915	128563739	A A	A A	A A	A A	A A	A A	A A
C2	chrC2.141423343	128585085	G A	G A	A A	A A	G A	A A	A A
C2	chrC2.141440172	128605104	G A	G A	A A	A A	G A	A A	A A
C2	chrC2.141541739	128684762	A A	A A	A A	A A	A A	A A	A A
C2	chrC2.141577171	128720285	A G	A G	G G	G G	A G	G G	G G
C2	chrC2.141608670	128738471	A G	A G	G G	G G	A G	G G	G G
C2	chrC2.141634769	128756553	A G	A G	G G	G G	A G	G G	G G
C2	chrC2.141663773	128778268	A A	A A	A A	A A	A A	A A	A A
C2	chrC2.141706326	128822345	A G	A G	G G	G G	A G	G G	G G
C2	chrC2.141739144	128840297	G A	G A	A A	A A	G A	A A	A A
C2	chrC2.141838522	128914506	G G	G G	G G	G G	A G	G G	G G
C2	chrC2.141965180	129015714	A A	A A	A A	A A	A A	A A	A A
C2	chrC2.142008396	129049315	G G	G G	G G	G G	G G	G G	G G
C2	chrC2.142113743	129142175	A A	A A	A A	A A	A A	A A	A A
C2	chrC2.142149629	129174824	G G	G G	G G	G G	G G	G G	G G
C2	chrC2.142262443	129270610	C C	C C	C C	C C	C C	C C	C C
C2	chrC2.142559462	129511605	A A	A A	A A	A A	A A	A A	A A
C2	chrC2.142610310	129551450	G G	G G	G G	G G	A G	G G	G G
C2	chrC2.142690526	129622334	C C	C C	C C	C C	C C	C C	A C
C2	chrC2.142812925	129727541	G A	G A	G G	G G	A A	G G	G G
C2	chrC2.142847690	129745801	A C	A C	A A	A A	C C	A A	A A
C2	chrC2.142884049	129775166	A A	A A	A A	A A	A A	A A	A A
C2	chrC2.142936757	129821772	A A	A A	A A	A A	A A	A A	A A
C2	chrC2.143007258	129871364	G A	G A	G G	G G	A A	G G	G G
C2	chrC2.143056147	129915903	G A	G A	G G	G G	A A	G G	G G
C2	chrC2.143122552	129971163	G A	G A	G G	G G	A A	G G	G G
C2	chrC2.143219391	130048989	G A	A A	A A	A A	G A	A A	A A
C2	chrC2.143257849	130082687	A A	A A	A A	A A	A A	A A	A A
C2	chrUn.80612277	130137662	G G	G G	G G	G G	G G	G G	G G
C2	chrC2.143388793	130207526	G A	A A	A A	A A	A A	A A	A A
C2	chrC2.143495813	130307953	A A	A A	A A	A A	A A	A A	0
C2	chrC2.143534768	130344797	A G	G G	G G	G G	G G	G G	0
C2	chrC2.143593221	130394756	A G	G G	G G	G G	G G	G G	G G
C2	chrC2.143673622	130470306	G G	G G	G G	G G	G G	G G	G G
C2	chrC2.143700177	130494737	G G	G G	G G	G G	G G	G G	G G
C2	chrC2.143922088	130681166	G G	G G	G G	G G	G G	G G	G G
C2	chrC2.143945192	130693896	G G	G G	G G	G G	G G	G G	G G
C2	chrC2.144054370	130793261	A A	A A	A A	A A	A A	A A	A A
C2	chrC2.144079704	130817033	A G	G G	G G	G G	G G	G G	G G
C2	chrC2.144112770	130843387	G G	G G	G G	G G	G G	G G	G G
C2	chrC2.144138848	130865934	A G	G G	G G	G G	G G	G G	G G
C2	chrC2.144195387	130911665	G A	A A	A A	A A	A A	A A	A A
C2	chrC2.144271533	130973912	A A	A A	A A	A A	A A	A A	A A
C2	chrC2.144311241	131011788	G G	G G	G G	G G	A G	G G	G G
C2	chrC2.144395616	131080855	A G	G G	G G	G G	G G	G G	G G
C2	chrC2.144431469	131110476	G G	G G	G G	G G	G G	G G	G G
C2	chrC2.144502055	131172161	A C	C C	C C	C C	C C	C C	C C
C2	chrC2.144527587	131191061	A G	G G	G G	G G	G G	G G	G G
C2	chrC2.144676922	131306295	A G	G G	G G	G G	G G	G G	G G
C2	chrC2.144738996	131341887	A A	A A	A A	A A	G A	A A	A A
C2	chrC2.144785754	131383554	G A	A A	A A	A A	G A	A A	A A
C2	chrC2.144809943	131405788	G G	G G	G G	G G	G G	G G	G G
C2	chrC2.144847620	131438090	A A	A A	A A	A A	A A	A A	A A
C2	chrC2.144908242	131488513	A A	A A	A A	A A	A A	A A	A A
C2	chrC2.144964190	131535387	G G	G G	G G	G G	G G	G G	G G
C2	chrC2.144996644	131556635	G G	G G	G G	G G	G G	G G	G G
C2	chrC2.145036526	131566216	A A	A A	A A	A A	A A	A A	A A
C2	chrC2.145161467	131661148	C C	C C	C C	C C	C C	C C	C C
C2	chrC2.145237081	131728672	A C	C C	C C	C C	A C	C C	C C
C2	chrC2.145280275	131766678	A G	G G	G G	G G	A G	G G	G G
C2	chrC2.145315926	131800782	G G	G G	G G	G G	A G	G G	G G
C2	chrC2.145356108	131840956	C C	C C	C C	C C	C C	C C	C C
C2	chrC2.145501348	131952383	A A	A A	A A	A A	C A	A A	A A
C2	chrC2.145533164	131976980	A A	A A	A A	A A	A A	A A	A A
C2	chrC2.145557495	131992072	G G	G G	G G	G G	A G	G G	G G
C2	chrC2.145584045	132016162	G G	G G	G G	G G	A G	G G	G G
C2	chrC2.145612853	132039588	G G	G G	G G	G G	G G	G G	G G
C2	chrC2.145647216	132070767	C C	C C	C C	C C	A C	C C	0
C2	chrC2.145679855	132098805	A A	A A	A A	A A	A A	A A	0
C2	chrUn.30694959	132173762	G G	G G	G G	G G	G G	G G	G G
C2	chrC2.145787129	132194448	A A	A A	A A	A A	G A	A A	A A
C2	chrC2.145896661	132277757	A G	G G	G G	G G	A G	G G	G G
C2	chrC2.146056925	132427255	G G	G G	G G	G G	G G	G G	G G
C2	chrC2.146279513	132606348	A G	G G	G G	G G	A G	G G	G G
C2	chrC2.146318336	132645176	A A	A A	A A	A A	A A	A A	A A
C2	chrC2.146532684	132824747	A A	A A	A A	A A	G A	A A	A A
C2	chrC2.146580582	132849979	C C	C C	C C	C C	A C	C C	C C
C2	chrC2.146605242	132874369	G A	A A	A A	A A	G A	A A	A A
C2	chrC2.146646101	132901262	A C	C C	C C	C C	C C	C C	C C
C2	chrC2.146673066	132919288	G G	G G	G G	G G	A G	G G	G G
C2	chrC2.146778230	133013702	A G	G G	G G	G G	G G	G G	G G
C2	chrC2.146804281	133035980	A G	G G	G G	G G	G G	G G	G G
C2	chrC2.146857521	133078459	A A	A A	A A	A A	G A	A A	A A
C2	chrC2.146923400	133137133	A A	A A	0	A A	A A	A A	0
C2	chrC2.146937107	133150839	G G	G G	G G	G G	A G	G G	0
C2	chrC2.146977562	133179402	G A	A A	A A	A A	G A	A A	A A
C2	chrC2.147209368	133374548	G G	G G	G G	G G	G G	G G	G G
C2	chrC2.147243929	133403375	A A	A A	A A	A A	A A	A A	A A
C2	chrC2.147390027	133516532	A G	G G	G G	G G	G G	G G	G G
C2	chrC2.147418466	133539240	A A	A A	A A	A A	A A	A A	A A
C2	chrC2.147514253	133611655	G G	G G	G G	G G	G G	G G	A G
C2	chrC2.147674048	133729756	G G	G G	G G	G G	G G	G G	G G
C2	chrC2.147708013	133756065	A A	A A	A A	A A	A A	A A	A A
C2	chrC2.147737111	133779515	G G	G G	G G	G G	G G	G G	G G
C2	chrC2.148006582	134015392	A A	A A	A A	A A	A A	A A	A A
C2	chrC2.148113633	134098384	G G	G G	G G	G G	A G	G G	G G
C2	chrC2.148227832	134186264	G G	G G	G G	G G	G G	G G	G G
C2	chrC2.148252989	134209762	G A	A A	A A	A A	A A	A A	A A
C2	chrC2.148279458	134233963	G G	G G	G G	G G	G G	G G	G G
C2	chrC2.148341374	134278823	C C	C C	C C	C C	C C	C C	C C
C2	chrC2.148369716	134304600	C C	C C	C C	C C	A C	C C	C C
C2	chrC2.148416617	134348139	G G	G G	G G	G G	A G	G G	G G
C2	chrC2.148474825	134392072	C C	C C	C C	C C	C C	C C	C C
C2	chrC2.148556851	134459305	C C	C C	C C	C C	C C	C C	C C
C2	chrC2.148643619	134536254	G G	A G	G G	G G	A A	G G	A G
C2	chrC2.148675015	134555055	G A	G A	A A	A A	G G	A A	G A
C2	chrC2.148707399	134582195	A A	G A	A A	A A	G G	A A	G A
C2	chrC2.148878601	134722285	G G	G G	G G	G G	A G	G G	G G
C2	chrC2.148915194	134753971	C C	C C	C C	C C	C C	C C	0
C2	chrC2.148979326	134801703	A A	A A	A A	A A	A A	A A	A A
C2	chrC2.149061239	134869206	G G	G G	G G	G G	A G	G G	G G
C2	chrC2.177813552	135176074	C C	A C	C C	C C	A C	C C	A C
C2	chrC2.177762765	135215552	G A	G A	G G	G G	G A	G G	G A
C2	chrC2.177606235	135326024	G A	G A	G G	G G	G A	G G	G A
C2	chrC2.177577228	135346820	G A	G A	G G	G G	G A	G G	G A
C2	chrC2.177524491	135394031	A G	A G	G G	G G	A G	G G	A G
C2	chrC2.177456542	135451526	C A	C A	C C	C C	C A	C C	C A
C2	chrC2.177363576	135524547	G G	A G	G G	G G	A G	G G	A G
C2	chrC2.177321308	135560073	G A	G A	G G	G G	G A	G G	G A
C2	chrC2.177254300	135607761	G A	G A	G G	G G	G A	G G	G A
C2	chrC2.177213319	135631298	A A	G A	A A	A A	G A	A A	G A
C2	chrC2.177186985	135657167	G G	G G	G G	G G	G G	G G	G G
C2	chrC2.177158849	135680510	G A	G A	G G	G G	G A	G G	G A
C2	chrC2.177023937	135790538	G A	G A	G G	G G	G A	G G	G A
C2	chrC2.176804856	135954516	A G	G G	G G	G G	G G	G G	G G
C2	chrC2.176707539	136044832	G G	A G	G G	G G	A G	G G	A G
C2	chrC2.176677892	136071200	G G	G G	G G	G G	G G	G G	G G
C2	chrC2.176506831	136202562	A A	G A	A A	A A	G A	A A	G A
C2	chrC2.176441706	136253749	G A	G A	A A	A A	G A	A A	G A
C2	chrC2.176400442	136289104	C C	A C	C C	C C	A C	C C	A C
C2	chrC2.176264816	136384694	G G	G G	G G	G G	G G	G G	G G
C2	chrC2.176195746	136439613	A G	A G	G G	G G	A G	G G	A G
C2	chrC2.176123074	136497825	C A	C A	A A	A A	C A	A A	C A
C2	chrC2.176063793	136542858	G A	G A	G G	G G	G A	G G	G A
C2	chrD4.72456644	136593020	A A	A A	A A	A A	A A	A A	A A
C2	chrC2.175943270	136629300	G A	A A	A A	A A	A A	A A	A A
C2	chrC2.175847115	136715036	A G	G G	G G	G G	G G	G G	G G
C2	chrC2.175787960	136767748	A G	G G	G G	G G	G G	G G	G G
C2	chrC2.175744202	136788755	A G	A G	A A	A A	A G	A A	A G
C2	chrC2.175652851	136853752	G G	A G	G G	G G	A G	G G	A G
C2	chrC2.175615960	136885579	A A	C A	A A	A A	C A	A A	C A
C2	chrC2.175615138	136886436	G A	G A	G G	G G	G A	G G	G A
C2	chrC2.175542530	136943948	C A	C A	C C	C C	C A	C C	C A
C2	chrC2.175507985	136976887	C C	A C	C C	C C	A C	C C	A C
C2	chrC2.175481795	136994570	G A	A A	A A	A A	A A	A A	A A
C2	chrC2.175433658	137037121	G A	A A	A A	A A	A A	A A	A A
C2	chrC2.175395947	137062313	A G	G G	G G	G G	G G	G G	G G
C2	chrC2.175367650	137084457	A G	G G	G G	G G	G G	G G	G G
C2	chrC2.175337001	137108027	G G	A G	G G	G G	A G	G G	A G
C2	chrC2.175310759	137133878	G G	A G	G G	G G	A A	A G	A G
C2	chrC2.175218723	137203771	G A	G G	G G	G G	G A	G A	G G
C2	chrUn.47917891	137211858	A A	A A	A A	A A	G A	G A	A A
C2	chrC2.175177097	137242314	G A	A A	A A	A A	A A	A A	A A
C2	chrC2.175144152	137265201	G A	G A	A A	A A	G A	A A	G A
C2	chrC2.174974190	137408134	A A	G A	A A	A A	G A	A A	G A
C2	chrC2.174787463	137545216	A C	C C	C C	C C	A C	A C	0
C2	chrC2.174761118	137568447	A C	C C	C C	C C	A C	A C	0
C2	chrC2.174723476	137591152	A G	A G	A A	A A	G G	A G	A G
C2	chrC2.174696607	137620200	G G	A G	G G	G G	A G	G G	A G
C2	chrC2.174623597	137682821	G A	A A	A A	A A	G A	G A	A A
C2	chrC2.174571402	137719816	A G	G G	G G	G G	A G	A G	0
C2	chrC2.174547865	137740580	G A	A A	A A	A A	G A	G A	A A
C2	chrC2.174454896	137817863	C A	C A	C C	C C	C A	C C	C A
C2	chrC2.174421588	137842525	A G	G G	G G	G G	G G	G G	G G
C2	chrC2.174341473	137893163	A A	C A	A A	A A	C A	A A	C A
C2	chrC2.174300180	137926345	A G	A G	G G	G G	A G	G G	A G
C2	chrC2.174255430	137972152	G A	G A	G G	G G	G A	G G	G A
C2	chrC2.174195739	138028327	A G	A G	G G	G G	A G	G G	A G
C2	chrC2.174107630	138099447	A C	A C	C C	C C	A C	C C	A C
C2	chrC2.174105851	138101224	A G	G G	G G	G G	G G	G G	G G
C2	chrC2.174029595	138165362	G A	G A	A A	A A	G A	A A	G A
C2	chrC2.173882945	138286234	A G	G G	G G	G G	G G	G G	G G
C2	chrC2.173847742	138311720	G G	G G	G G	G G	A G	A G	G G
C2	chrC2.173802457	138346856	G A	G A	G G	G G	A A	G A	G A
C2	chrC2.173714061	138411243	C A	C A	C C	C C	C A	C C	C A
C2	chrC2.173631034	138481242	G G	G G	G G	G G	G G	G G	G G
C2	chrC2.173572562	138536012	A G	A G	A A	A A	G G	A G	A G
C2	chrC2.173321757	138730765	A A	A A	A A	A A	C C	C C	A A
C2	chrC2.173229005	138800996	A A	A A	A A	A A	C A	C A	A A
C2	chrC2.173137883	138877556	G A	A A	A A	A A	A A	A A	A A
C2	chrC2.173063842	138939914	A A	C A	A A	A A	C A	A A	C A
C2	chrC2.173029035	138963381	A G	A G	A A	A A	G G	A G	A G
C2	chrC2.172964348	139012951	G G	A G	G G	G G	A G	G G	A G
C2	chrC2.172935362	139034310	A G	A G	A A	A A	G G	A G	A G
C2	chrC2.172893240	139072820	A G	A G	0	0	G G	A G	A G
C2	chrC2.172869190	139085980	A A	A A	A A	A A	A A	A A	A A
C2	chrC2.172842473	139102151	A G	G G	G G	G G	G G	G G	G G
C2	chrC2.172779424	139154517	G G	G G	G G	G G	A G	A G	G G
C2	chrC2.172749399	139176255	G A	G A	G G	G G	A A	G A	G A
C2	chrC2.172721441	139201729	G A	G A	G G	G G	A A	G A	G A
C2	chrC2.172712830	139210336	A G	A G	A A	A A	G G	A G	A G
C2	chrC2.172685832	139232691	G A	G A	G G	G G	A A	G A	G A
C2	chrC2.172659622	139255091	G A	G A	G G	G G	A A	G A	G A
C2	chrC2.172591993	139320456	C A	C A	C A	0	A A	C A	C A
C2	chrC2.172561728	139335729	G G	A G	G G	G G	A A	A G	A G
C2	chrC2.172519125	139371310	G A	A A	A A	A A	A A	A A	0
C2	chrC2.172465440	139418028	A G	A G	G G	G G	A G	G G	A G
C2	chrC2.172409903	139456601	A A	A A	A A	A A	A A	A A	0
C2	chrC2.172258741	139585764	A A	G A	A A	A A	G A	A A	G A
C2	chrC2.172227819	139612066	A A	G A	A A	A A	G G	G A	G A
C2	chrC2.172170459	139661990	G G	A G	G G	G G	A G	G G	A G
C2	chrC2.172134589	139686065	A G	A G	G G	G G	A G	G G	A G
C2	chrC2.172071560	139733882	C C	A C	C C	C C	A A	A C	A C
C2	chrC2.172034152	139768342	G G	A G	G G	G G	A G	G G	A G
C2	chrC2.171992250	139794640	G G	A G	G G	G G	A A	A G	A G
C2	chrC2.171948434	139833638	A G	A G	G G	G G	A G	G G	A G
C2	chrC2.171904228	139873752	C A	C A	A A	A A	C A	A A	C A
C2	chrC2.171823111	139953141	G G	G G	G G	G G	A G	A G	G G
C2	chrC2.171699126	140034452	C A	A A	A A	A A	C A	C A	A A
C2	chrC2.171666409	140052477	A A	A A	A A	A A	A A	A A	A A
C2	chrC2.171562201	140120548	G A	A A	A A	A A	A A	A A	A A
C2	chrC2.171521320	140151282	A G	A G	A A	A A	G G	A G	A G
C2	chrC2.171509012	140164898	C C	A C	C C	C C	A C	C C	A C
C2	chrC2.171450179	140217609	A A	A A	A A	A A	A A	A A	A A
C2	chrC2.171449793	140217995	A G	G G	G G	G G	A G	A G	G G
C2	chrC2.171420507	140248543	G A	A A	A A	A A	A A	A A	A A
C2	chrC2.171372849	140291132	G A	A A	A A	A A	G A	A A	A A
C2	chrC2.171330018	140322171	G G	G G	G G	G G	G G	A G	G G
C2	chrC2.171273444	140369800	G A	A A	A A	A A	A A	G A	A A
C2	chrC2.171245140	140393405	G A	A A	A A	A A	A A	A A	A A
C2	chrC2.171160419	140457557	A C	C C	C C	C C	C C	C C	C C
C2	chrC2.171122880	140491539	G A	A A	A A	A A	A A	G A	A A
C2	chrC2.171038275	140576034	G G	A G	G G	G G	A A	A G	A G
C2	chrC2.170974516	140633966	A A	A A	A A	A A	A A	C A	A A
C2	chrC2.170904833	140683127	C A	C A	C C	C C	A A	C C	C A
C2	chrC2.170857423	140723908	G A	G A	G G	G G	G A	G A	G A
C2	chrC2.170817522	140743213	A G	G G	G G	G G	G G	G G	G G
C2	chrC2.170696572	140853349	A A	A A	A A	A A	G A	G A	A A
C2	chrC2.170664455	140878723	A A	A A	A A	A A	A A	A A	A A
C2	chrC2.170627114	140912021	A A	G A	A A	A A	G G	A A	G A
C2	chrC2.170584491	140943270	G G	G G	G G	G G	G G	G G	G G
C2	chrC2.170546003	140984522	A G	A G	A A	A A	G G	A G	A G
	Homozygous region (bp)	22 074 617
	Strongest candidate region is bolded

## Sheet: Chr D1
		Status	Healthy carrier	Healthy carrier	Affected	Affected	Non carrier	Putative healthy carrier	Non affected
Chr	SNP	Position (bp)	Dam	Sire	Proband	Brother	Grandfather	Grandmother	Proband's littermate
D1	chrD1.374987	358917	AC	CC	CC	CC	AC	AC	CC
D1	chrD1.468003	431743	GG	GG	GG	GG	GG	GG	GG
D1	chrD1.492223	454890	AG	GG	GG	GG	AG	GG	GG
D1	chrD1.532458	487322	GG	GG	GG	GG	GG	AG	GG
D1	chrD1.557409	497081	AG	GG	GG	GG	AG	GG	GG
D1	chrD1.594325	516680	GG	GG	GG	GG	GG	AG	GG
D1	chrD1.646100	569804	CC	CC	CC	CC	CC	AC	CC
D1	chrD1.706570	610109	GG	AG	GG	GG	AG	GG	GG
D1	chrD1.750826	642073	GG	GG	GG	GG	GG	GG	GG
D1	chrD1.797230	680592	AA	GA	AA	AA	GA	AA	AA
D1	chrD1.830447	705421	AG	GG	GG	GG	AG	GG	GG
D1	chrD1.902771	755771	AG	AG	AA	AA	GG	AG	AA
D1	chrF1.46573	811369	GA	AA	AA	AA	GA	AA	AA
D1	chrD1.1083709	918360	GA	AA	AA	AA	GA	AA	AA
D1	chrD1.1128536	963118	GA	GA	GG	GG	AA	GA	GG
D1	chrD1.1187391	1016652	CC	CC	CC	CC	CC	CC	CC
D1	chrUn.56604669	1081968	GA	GA	GG	GG	AA	GA	GG
D1	chrD1.1271784	1092827	AG	AG	AA	AA	GG	AG	AA
D1	chrD1.1405624	1212174	AG	GG	GG	GG	AG	GG	GG
D1	chrD1.1492197	1290828	GG	AG	GG	GG	AG	AG	GG
D1	chrD1.1581468	1360111	GG	GG	GG	GG	GG	AG	GG
D1	chrD1.1697498	1440472	AA	GA	AA	AA	GA	AA	AA
D1	chrD1.1767585	1482974	GG	AG	GG	GG	AG	AG	GG
D1	chrD1.1856518	1550356	GA	AA	AA	AA	GA	GA	AA
D1	chrD1.1882358	1567609	GA	AA	AA	AA	GA	GA	AA
D1	chrD1.1912735	1601576	CC	CC	CC	CC	AC	AC	CC
D1	chrD1.2070598	1726479	GG	GG	GG	GG	AG	AG	GG
D1	chrD1.2112557	1762864	GA	AA	AA	AA	GA	GA	AA
D1	chrD1.2169520	1806731	AG	GG	GG	GG	GG	GG	GG
D1	chrD1.2229157	1839607	GG	GG	GG	GG	AG	AG	GG
D1	chrD1.2337524	1934424	AA	AA	AA	AA	GA	GA	AA
D1	chrD1.2363179	1950788	CC	CC	CC	CC	AC	AC	CC
D1	chrD1.2391028	1974848	GG	AG	GG	GG	AG	GG	GG
D1	chrD1.2442119	1993002	AA	GA	AA	AA	GA	AA	AA
D1	chrD1.2478056	2028938	GG	AG	GG	GG	AA	AG	GG
D1	chrD1.2547570	2065638	AA	GA	AA	AA	GG	AA	AA
D1	chrD1.2592307	2110377	AG	GG	GG	GG	GG	AG	GG
D1	chrD1.2653906	2152440	CC	CC	CC	CC	CC	CC	CC
D1	chrD1.2725375	2198116	GG	GG	GG	GG	GG	GG	GG
D1	chrD1.2774563	2235755	GG	AG	GG	GG	AG	GG	GG
D1	chrD1.2899714	2338173	AA	GA	AA	AA	GA	GA	AA
D1	chrD1.2973973	2397279	AA	AA	AA	AA	AA	GA	AA
D1	chrD1.2974365	2397671	GG	GG	GG	GG	GG	AG	GG
D1	chrD1.3011208	2433840	GA	AA	AA	AA	AA	AA	AA
D1	chrD1.3135386	2543917	AA	AA	AA	AA	AA	AA	AA
D1	chrD1.3188915	2573604	AA	AA	AA	AA	AA	GA	AA
D1	chrD1.3215058	2590928	AA	AA	AA	AA	AA	GA	AA
D1	chrD1.3390204	2739913	GG	GG	GG	GG	GG	GG	GG
D1	chrD1.3435211	2768933	GG	AG	GG	GG	AA	GG	GG
D1	chrD1.3514583	2842308	AA	AA	AA	AA	AA	GA	AA
D1	chrD1.3582865	2901096	CC	CC	CC	CC	CC	CC	CC
D1	chrD1.3655595	2944519	AA	AA	AA	AA	AA	AA	AA
D1	chrD1.3773781	3039846	GG	GG	GG	GG	GG	GG	GG
D1	chrD1.3870445	3111601	GA	GA	AA	AA	GG	GA	AA
D1	chrD1.3923767	3147883	AA	AA	AA	AA	AA	AA	AA
D1	chrD1.3987379	3203678	AA	AA	AA	AA	GA	AA	AA
D1	chrD1.4052406	3257507	CC	AC	CC	CC	AC	CC	CC
D1	chrD1.4082727	3285471	GG	AG	GG	GG	AG	GG	GG
D1	chrD1.4087227	3289971	AA	AA	AA	AA	AA	AA	AA
D1	chrD1.4140039	3332271	CC	CC	CC	CC	CC	CC	CC
D1	chrD1.4217003	3384294	AA	AA	AA	AA	AA	AA	AA
D1	chrD1.4264358	3427217	GG	AG	GG	GG	AA	GG	GG
D1	chrUn.33462101	3446665	AA	GA	AA	AA	GA	GA	AA
D1	chrD1.4415457	3562009	GG	AG	GG	GG	AA	AG	GG
D1	chrD1.4466410	3599752	AA	GA	AA	AA	GG	GA	AA
D1	chrD1.4509539	3623062	GG	GG	GG	GG	GG	GG	GG
D1	chrD1.4538577	3641720	AA	GA	AA	AA	GG	AA	AA
D1	chrD1.4681259	3762488	AA	AA	AA	AA	AA	AA	AA
D1	chrD1.4770645	3845385	AA	GA	AA	AA	GG	AA	AA
D1	chrD1.4801928	3883879	GG	AG	GG	GG	AA	GG	GG
D1	chrD1.4849277	3927115	GG	AG	GG	GG	AA	AG	GG
D1	chrD1.4877838	3951160	GG	GG	GG	GG	GG	GG	GG
D1	chrD1.5069991	4101675	CA	AA	AA	AA	AA	AA	AA
D1	chrD1.5111472	4138311	AA	AA	AA	AA	AA	AA	AA
D1	chrD1.5135588	4162243	AA	CA	AA	AA	CC	AA	AA
D1	chrD1.5237546	4213145	GA	GA	AA	AA	GG	GA	AA
D1	chrD1.6377769	4322296	GG	AG	GG	GG	AG	GG	GG
D1	chrD1.6300766	4365507	AG	AG	GG	GG	AG	AG	GG
D1	chrD1.6156979	4439775	GG	GG	GG	GG	AG	GG	GG
D1	chrD1.5916299	4472773	AA	AA	AA	AA	AA	CA	AA
D1	chrUn.45923492	4476723	GG	AG	GG	GG	AA	AG	GG
D1	chrD1.6509233	4518254	AA	CA	AA	AA	CC	AA	AA
D1	chrE3.43050459	4695430	AG	GG	GG	GG	AG	AG	GG
D1	chrC1.210339936	4742270	AA	GA	AA	AA	GA	GA	AA
D1	chrD1.5270572	4842798	GA	AA	AA	AA	AA	AA	AA
D1	chrUn.37431608	4898546	AG	AG	GG	GG	AA	AG	GG
D1	chrD1.5494195	4948768	AG	AG	GG	GG	AG	GG	GG
D1	chrD1.5604918	5012565	GA	GA	AA	AA	GA	GA	AA
D1	chrD1.5707344	5089422	GG	AG	GG	GG	AG	AG	GG
D1	chrD1.5755970	5133296	CC	CC	CC	CC	CC	CC	CC
D1	chrD1.5788148	5162321	AC	CC	CC	CC	CC	CC	CC
D1	chrD1.5837584	5206223	AA	AA	AA	AA	AA	GA	AA
D1	chrD1.5889660	5250899	AA	CA	AA	AA	CA	AA	AA
D1	chrD1.6074238	5360671	AG	AG	GG	GG	AA	GG	GG
D1	chrD1.6474165	5529256	CC	AC	CC	CC	AC	CC	CC
D1	chrE1.42787620	5562296	CC	CC	CC	CC	CC	CC	CC
D1	chrD1.6711159	5659414	AA	AA	AA	AA	AA	GA	AA
D1	chrD1.6750091	5694072	CA	CA	CC	CC	AA	CA	CC
D1	chrD1.6820391	5741172	GG	AG	GG	GG	AA	AG	GG
D1	chrD1.6864499	5779280	CC	AC	CC	CC	AC	CC	CC
D1	chrD1.6910764	5815369	GA	GA	AA	AA	GG	GA	AA
D1	chrD1.6955592	5853586	AA	GA	AA	AA	GG	AA	AA
D1	chrD1.7058730	5939667	AA	GA	AA	AA	GG	AA	AA
D1	chrD1.7085015	5963000	AA	AA	AA	AA	AA	CA	AA
D1	chrD1.7131799	5997756	AA	GA	AA	AA	GG	GA	AA
D1	chrD1.7218633	6082232	GG	AG	GG	GG	AA	GG	GG
D1	chrD1.7245397	6108644	CA	CA	AA	AA	CC	AA	AA
D1	chrD1.7287544	6138561	GG	GG	GG	GG	GG	GG	GG
D1	chrD1.7372671	6215413	GA	AA	AA	AA	GA	GA	AA
D1	chrD1.7419359	6248829	CA	AA	AA	AA	CA	AA	AA
D1	chrD1.7463712	6278338	CA	AA	AA	AA	CA	AA	AA
D1	chrD1.7494505	6311266	AG	GG	GG	GG	GG	GG	GG
D1	chrD1.7552229	6348836	AG	GG	GG	GG	GG	GG	GG
D1	chrD1.7600165	6391824	GA	AA	AA	AA	AA	AA	AA
D1	chrD1.7728653	6490130	AA	CA	AA	AA	CA	AA	AA
D1	chrD1.7772256	6534282	AG	AG	AA	AA	GG	AG	AA
D1	chrD1.7813859	6572499	GG	AG	GG	GG	AG	GG	GG
D1	chrD1.7852704	6609408	AG	AG	AA	AA	GG	AG	AA
D1	chrD1.8062004	6766982	GG	AG	GG	GG	AA	GG	GG
D1	chrD1.8144249	6827728	AC	CC	CC	CC	CC	CC	CC
D1	chrD1.8249935	6882660	GG	AG	GG	GG	AG	AG	GG
D1	chrD1.8277509	6896692	AA	AA	AA	AA	GA	GA	AA
D1	chrD1.8310403	6917010	CC	AC	CC	CC	AC	AC	CC
D1	chrD1.8482821	7028681	GA	AA	AA	AA	AA	AA	AA
D1	chrUn.52925561	7050406	AA	AA	AA	AA	AA	AA	AA
D1	chrD1.8545663	7075309	AA	GA	AA	AA	GG	AA	AA
D1	chrD1.8650884	7150414	AA	GA	AA	AA	GG	GA	AA
D1	chrD1.8737938	7226179	AA	AA	AA	AA	AA	AA	AA
D1	chrD1.8777560	7255310	AA	GA	AA	AA	GG	GA	AA
D1	chrD1.8807686	7280983	AA	AA	AA	AA	AA	AA	AA
D1	chrD1.8862632	7327116	CC	AC	CC	CC	AA	AC	CC
D1	chrD1.8931256	7390087	GG	GG	GG	GG	AG	AG	GG
D1	chrD1.9005108	7455565	AG	AG	AA	AA	GG	AG	AA
D1	chrD1.9174279	7596438	AC	AC	AA	AA	CC	AC	AA
D1	chrD1.9212945	7630808	AA	CA	AA	AA	CA	CA	AA
D1	chrD1.9250017	7663614	GG	GG	GG	GG	GG	GG	GG
D1	chrD1.9317021	7701893	CA	CA	AA	AA	CC	CA	AA
D1	chrD1.9343967	7728841	AG	GG	GG	GG	AG	GG	GG
D1	chrD1.9384435	7755821	AG	GG	GG	GG	AG	GG	GG
D1	chrD1.9437385	7790084	GA	AA	AA	AA	GA	AA	AA
D1	chrD1.9479582	7826653	GG	GG	GG	GG	AG	GG	GG
D1	chrD1.9547827	7882224	AA	GA	AA	AA	GA	AA	AA
D1	chrD1.9648983	7964016	GA	GA	GG	GG	AA	GA	GG
D1	chrD1.9694844	7996166	GG	AG	GG	GG	AG	GG	GG
D1	chrD1.9748450	8048597	GG	GG	GG	GG	AG	GG	GG
D1	chrD1.9842441	8132468	GA	AA	AA	AA	GA	GA	AA
D1	chrD1.9868406	8150996	GA	AA	AA	AA	GA	GA	AA
D1	chrD1.9899072	8178298	AC	AC	CC	CC	AA	AC	CC
D1	chrD1.10188183	8422667	GG	AG	GG	GG	AG	AG	GG
D1	chrD1.10227155	8453075	AC	CC	CC	CC	CC	CC	CC
D1	chrD1.10362361	8554729	AG	AG	GG	GG	AA	AG	GG
D1	chrD1.10419016	8604211	CC	AC	CC	CC	AC	CC	CC
D1	chrD1.10544152	8690363	AG	GG	GG	GG	GG	GG	GG
D1	chrD1.10551739	8697950	GG	GG	GG	GG	AG	GG	GG
D1	chrD1.10580582	8719715	AG	AG	GG	GG	AA	AG	GG
D1	chrB3.129068344	8732497	AA	GA	AA	AA	GA	AA	AA
D1	chrD1.10612199	8750774	AA	GA	AA	AA	GA	AA	AA
D1	chrD1.10641327	8772840	AA	CA	AA	AA	CA	AA	AA
D1	chrD1.10642618	8774131	GG	AG	GG	GG	AG	GG	GG
D1	chrD1.10676049	8803482	GG	GG	GG	GG	GG	AG	GG
D1	chrD1.10707606	8822745	AG	AG	GG	GG	AA	AG	GG
D1	chrD1.10775458	8886778	AA	AA	AA	AA	CA	AA	AA
D1	chrD1.10894280	8992512	AG	GG	GG	GG	GG	GG	GG
	Homozygous region (bp)	8 633 595

## Sheet: Chr E1
		Status	Healthy carrier	Healthy carrier	Affected	Affected	Non carrier	Putative healthy carrier	Non affected
Chr	SNP	Position (bp)	Dam	Sire	Proband	Brother	Grandfather	Grandmother	Proband's littermate
E1	chrE1.59896526	32705973	GG	GG	GG	GG	GG	GG	GG
E1	chrE1.59962163	32764544	AA	AA	AA	AA	AA	AA	AA
E1	chrE1.60205326	32909329	GA	GA	AA	AA	AA	GG	AA
E1	chrE1.60535186	33190978	GA	GA	AA	AA	GA	GA	AA
E1	chrE1.60612700	33255134	GG	GG	GG	GG	GG	GG	GG
E1	chrE1.60641658	33279376	CA	CA	AA	AA	CA	CA	AA
E1	chrE1.60793114	33402295	GG	GG	GG	GG	GG	GG	GG
E1	chrE1.60822121	33430565	AG	AG	GG	GG	GG	AA	GG
E1	chrE1.60872892	33469475	AA	GA	AA	AA	AA	GA	AA
E1	chrE1.60923086	33511907	AA	AA	AA	AA	AA	AA	AA
E1	chrE1.60960718	33540429	AA	CA	AA	AA	AA	CA	AA
E1	chrE1.60985484	33565166	AA	GA	AA	AA	AA	GG	AA
E1	chrE1.61088430	33652082	GG	AG	GG	GG	GG	AA	GG
E1	chrE1.61148405	33705072	GA	AA	AA	AA	AA	AA	AA
E1	chrE1.61178235	33721790	AA	GA	AA	AA	AA	GG	AA
E1	chrE1.61338185	33847660	GA	GA	AA	AA	AA	GG	AA
E1	chrE1.61397570	33898430	AC	AC	CC	CC	AC	AC	CC
E1	chrE1.61401972	33911279	AA	CA	AA	AA	CA	CA	AA
E1	chrE1.61453649	33957515	GA	AA	AA	AA	AA	AA	AA
E1	chrE1.61494472	33981461	AG	AG	GG	GG	AG	AG	GG
E1	chrE1.61547623	34023007	AA	AA	AA	AA	GA	AA	AA
E1	chrUn.11205570	34061631	AG	AG	GG	GG	GG	AA	GG
E1	chrE1.61683740	34137629	AG	AG	AA	AA	AG	GG	AA
E1	chrE1.61712026	34163846	GG	GG	GG	GG	GG	GG	GG
E1	chrE1.61768854	34208416	GA	GA	GG	GG	GA	AA	GG
E1	chrE1.61870281	34291124	AG	AG	GG	GG	GG	AG	GG
E1	chrE1.61976579	34380624	GG	GG	GG	GG	AG	GG	GG
E1	chrE1.62013047	34410209	AG	AG	AA	AA	AG	GG	AA
E1	chrE1.62131792	34504257	AA	AA	AA	AA	GA	AA	AA
E1	chrE1.62169405	34530869	GG	GG	GG	GG	GG	GG	GG
E1	chrE1.62208800	34566263	AC	AC	AA	AA	AC	CC	AA
E1	chrE1.62253330	34603875	AA	AA	AA	AA	GA	GA	AA
E1	chrUn.21735262	34615922	GA	GA	AA	AA	GA	GG	0
E1	chrE1.62288163	34636217	AG	AG	GG	GG	AG	AA	GG
E1	chrE1.62361772	34694657	AA	AA	AA	AA	AA	AA	AA
E1	chrE1.62430529	34755383	AA	AA	AA	AA	AA	AA	AA
E1	chrE1.62459667	34780407	AA	AA	AA	AA	AA	AA	AA
E1	chrE1.62572018	34860116	AG	AG	GG	GG	AG	AG	GG
E1	chrE1.62638391	34916118	AG	AG	GG	GG	AG	AG	GG
E1	chrE1.62668662	34938738	AG	AG	GG	GG	GG	AG	GG
E1	chrE1.62722232	34980511	GA	GA	AA	AA	AA	GA	AA
E1	chrE1.62749728	35005335	AC	AC	CC	CC	CC	AC	CC
E1	chrE1.62886060	35113794	GG	GG	GG	GG	GG	AG	GG
E1	chrE1.62924901	35147417	GG	GG	GG	GG	GG	AG	0
E1	chrE1.63013551	35209041	AC	AC	CC	CC	CC	AC	CC
E1	chrE1.63061609	35249894	GA	GA	AA	AA	GA	GG	AA
E1	chrE1.63171641	35339509	AA	AA	AA	AA	AA	GA	AA
E1	chrE1.63262409	35416396	GG	GG	GG	GG	AG	AG	GG
E1	chrUn.33557086	35441860	GG	GG	GG	GG	GG	GG	GG
E1	chrE1.63306721	35449343	GG	GG	GG	GG	GG	GG	GG
E1	chrE1.63340500	35471996	AA	AA	AA	AA	GA	GA	AA
E1	chrE1.63367053	35495846	AA	AA	AA	AA	AA	AA	AA
E1	chrE1.63436951	35543013	AA	AA	AA	AA	AA	GA	AA
E1	chrE1.63478918	35571239	GG	GG	GG	GG	AG	GG	GG
E1	chrE1.63514759	35601600	GA	GA	AA	AA	AA	GA	AA
	Homozygous region (bp)	2 895 627
